# Supplementary material for: Visible-light-driven photocatalyst based upon metal-free covalent triazine-based frameworks for enhanced hydrogen production
Source: Royal Society of Chemistry journal article supplement (doi:10.1039/d0cy02094j), 2021-01-01
Supplement: d0cy02094j1.pdf [file d0cy02094j1.pdf]

## Electronic Supplementary Information

### Visible-light-driven photocatalyst based upon metal-free covalent triazine-based frameworks for enhanced hydrogen production

Zunkun Tan<sup>a</sup>, Peng Zhang<sup>a</sup>, Qiaoshan Chen<sup>a,\*</sup>, Shengqiong Fang<sup>a</sup>, Guocheng Huang<sup>a</sup>,  
Jinhong Bi<sup>a,b,\*</sup>, Ling Wu<sup>b</sup>

<sup>a</sup>Department of Environmental Science and Engineering, Fuzhou University, Minhou, Fujian 350108, P. R. China, Email: chenqiaoshan@fzu.edu.cn

<sup>b</sup>State Key Laboratory of Photocatalysis on Energy and Environment, Fuzhou University, Minhou, Fujian 350108, P. R. China, Email: bijinhong@fzu.edu.cn

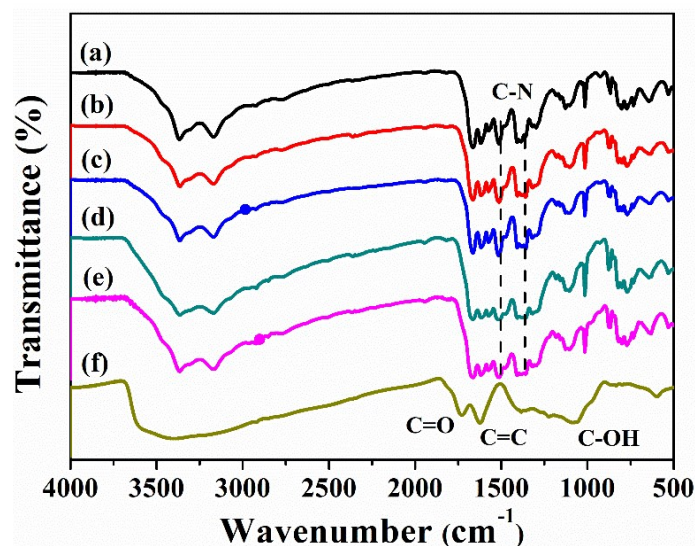

**Fig. S1.** FTIR spectra of CTF-1 (a), CTF-1/rGO-1 (b), CTF-1/rGO-2 (c), CTF-1/rG-5 (d), CTF-1/rGO-10 (e), and GO (f).

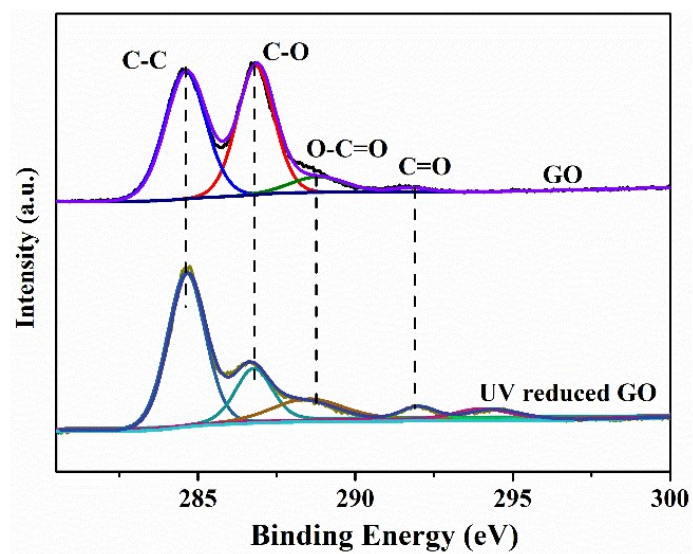

Fig. S2. C1s XPS spectra of GO and UV reduced GO.

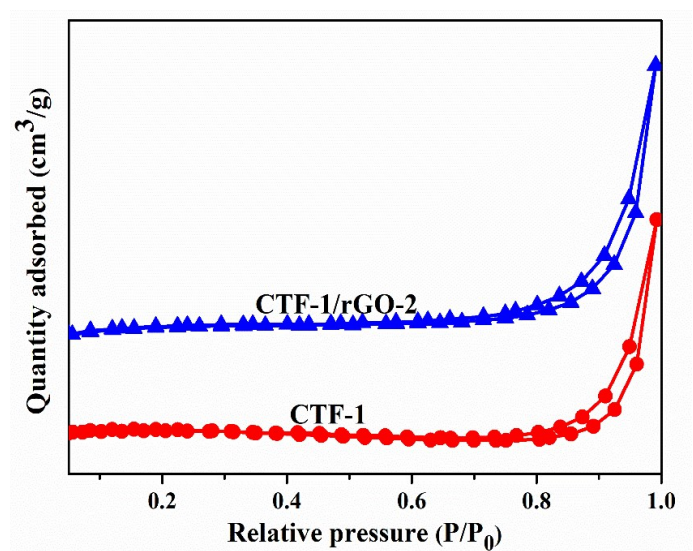

Fig. S3. N<sub>2</sub> adsorption-desorption isotherms of CTF-1 and CTF-1/rGO-2.

**Table S1** Pore volumes, average pore sizes, BET surface areas of CTF-1 and CTF-1/rGO-2.

| Photocatalyst | Pore volume (cm <sup>3</sup> /g) | Average pore size (nm) | Surface area (m <sup>2</sup> /g) |
|---------------|----------------------------------|------------------------|----------------------------------|
| CTF-1         | 0.01                             | 23.4                   | 2.8                              |
| CTF-1/rGO-2   | 0.02                             | 14.9                   | 5.7                              |

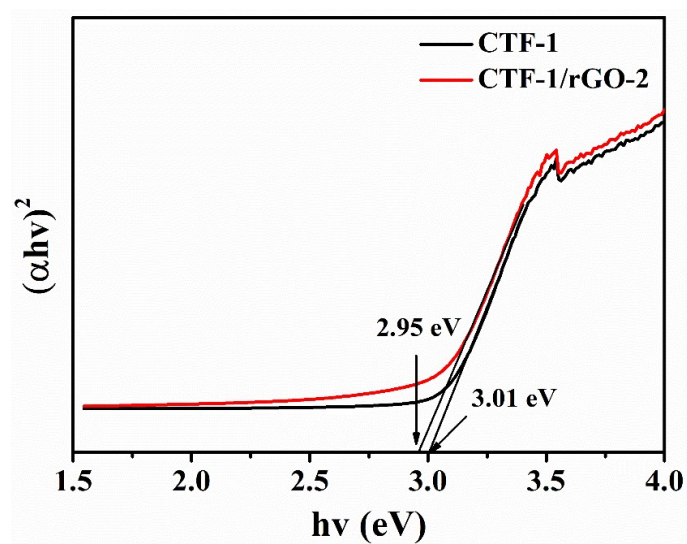

**Fig. S4.** Band gaps of CTF-1 and CTF-1/rGO-2.

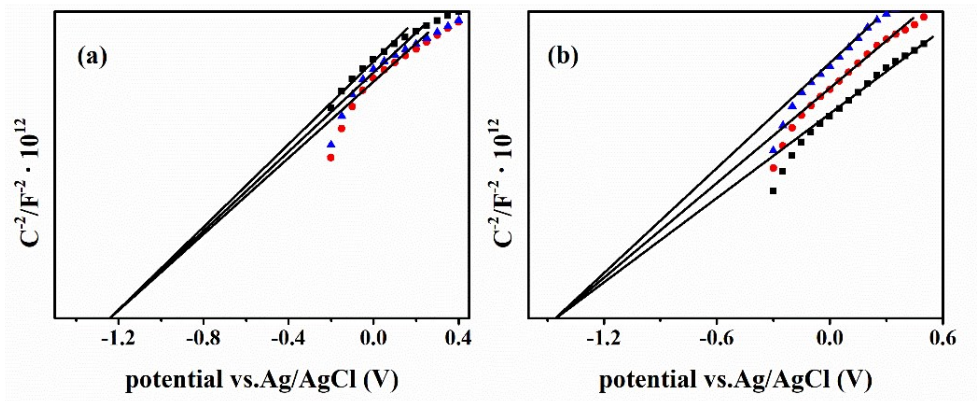

**Fig. S5.** Mott-Schottky of CTF-1 (a) and CTF-1/rGO-2 (b).

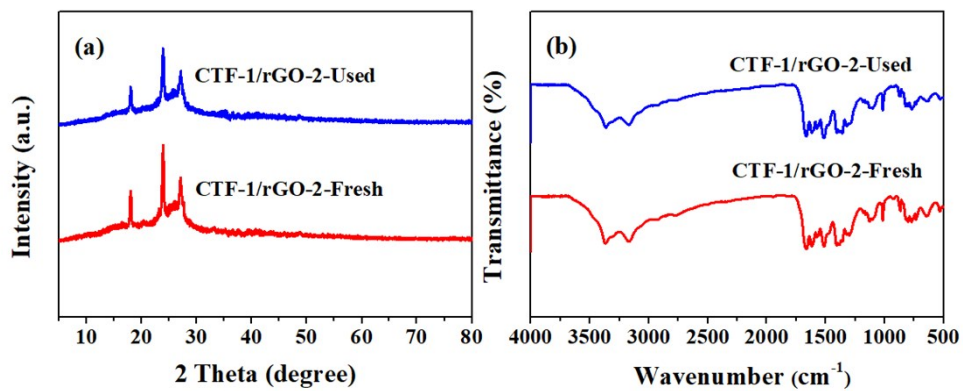

**Fig. S6.** XRD patterns (a) and FTIR spectra (b) of fresh and used CTF-1/rGO-2 after photocatalytic experiments for five cycles.
